# Supplementary material for: Porous carbon synthesized by direct carbonization of potassium biphthalate for high-performance supercapacitors
Source: Springer Nature journal article supplement (doi:10.1007/s10008-013-2236-7), 2013-09-04
Supplement: MOESM1 [file 10008_2013_2236_MOESM1_ESM.doc]

### Supporting Information:

**Fig. S1. carbon-900** sample: (a) CV curves of the 1st and 10000th cycles; (b) Galvanostatic charge-discharge curves at various current densities; (c) CV curves at various scan rates; (d) Specific capacitances calculated from CV curves.
